# Supplementary material for: Improving Environmental Management on Small-scale Farms: Perspectives of Extension Educators and Horse Farm Operators
Source: Springer Nature journal article supplement (doi:10.1007/s00267-014-0376-x), 2014-09-29
Supplement: MOESM1 [file 5193318]

**Appendix A**

**Horse Farm Assessment Checklist**

Date & Time:

Weather (temperature/precipitation):

Web Soil Survey:

**Background Information:**

Owner or manager (circle one)?

Years owning/managing this property:

Years owning/managing horses:

Primary profession:

Do you have an agricultural background (educational, family, professional, etc.)?

**Farm Information:**

Number of horses:

Farm type/primary use of horses on this farm:

Other livestock or crops:

Slope of land (circle one): Very hilly, somewhat hilly, mostly flat, very flat

Waterways on or adjacent to the property:

Acres of pasture: Number of pastures:

Number of dry lots:

**Assessment:**

| **Condition or Practice** | **NA** | **Low** | **Med** | **High** | **Comments:** |
| --- | --- | --- | --- | --- | --- |
| Grazing Intensity - % ground cover |  | >90% cover | 50-90% cover | <50% cover |  |
| Grazing Intensity - forage height |  | >3" | 1-3" | <1" |  |
| Weed Invasion |  | Max control: <5% undesir-able weeds | Moderate control: 5-30% undesir-able weeds | Minimal control: >30% undesir-able weeds |  |

| **Condition or Practice** | **NA** | **Low** | **Med** | **High** | **Comments:** |
| --- | --- | --- | --- | --- | --- |
| Pasture erosion (sheet erosion, rills, and gullies) |  | Little or no erosion | Confined to steep terrain and heavy use areas | Erosion throughout |  |
| Surface water & wetlands - access |  | Completely restricted | Some restrictions | No restrictions |  |
| Riparian areas - vegetative buffer |  | > 25 ft | 10-25 ft | <10 ft |  |
| Riparian areas - erosion |  | Little or no erosion | Moderate erosion | Extreme erosion |  |
| Sacrifice lot buffer (from roads & water) |  | 50-100 ft vegetative buffer | 25-50 ft vegetative buffer | <25 ft vegetative buffer |  |
| Sacrifice lot surface |  | <1 inch mud and/or manure | 1-3 inches mud and/or manure | >3 inches mud and/or manure |  |
| Pads, mulch, or gravel in heavy use areas. |  | All heavy use areas have effective pads | Some heavy use areas have pads or not all pads are effective | No heavy use area pads |  |
| Manure Storage - surface |  | Imperme-able/  Concrete |  | Permeable |  |
| Manure Storage -covered |  | Covered |  | Not covered |  |
| Manure Storage - location |  | >100ft to well or wetlands | 50 - 100ft to well or wetlands | <50ft to well or wetlands |  |
| Manure Usage |  | Composted and used as fertilizer | Spread directly or piled/not used | Landfill |  |
